# Supplementary material for: Reversible inhibition of the blood-testis barrier protein improves stem cell homing in mouse testes
Source: PubMed Central journal article supplement — J Reprod Dev. 2018 Sep 1;64(6):511–22. doi: 10.1262/jrd.2018-093 (PMC6305854; doi:10.1262/jrd.2018-093), 2018-09-01
Supplement: jrd-64-511-s001.pdf [file jrd-64-511-s001.pdf]

**Supplementary Table 1. Antibodies**

| <b>Immunofluorescence</b>                                    |                                                                   |                               |
|--------------------------------------------------------------|-------------------------------------------------------------------|-------------------------------|
| <b>Antigen</b>                                               | <b>Name</b>                                                       | <b>Company</b>                |
| CLDN3                                                        | Anti-Claudin-3 antibody                                           | Thermo fisher(34-1700)        |
| CLDN5                                                        | Anti-Claudin-5 antibody                                           | Abcam(ab15106)                |
| CLDN11                                                       | Anti-Oligodendrocyte specific protein antibody                    | Abcam(ab53041)                |
| SYCP3                                                        | Rabbit anti-SYCP3 antibody                                        | Gift from Dr. Chuma S.        |
| CLGN                                                         | Rabbit anti-CLGN antibody                                         | Abcam(ab171971)               |
| <b>Secondary reagents</b>                                    |                                                                   |                               |
| Alexa Fluor 647-conjugated goat anti-rabbit IgG              |                                                                   | Molecular Probes (A21245)     |
| Alexa Fluor 488-conjugated goat anti-rabbit IgG              |                                                                   | Invitrogen(A110008)           |
| Rhodamine peanut agglutinin                                  |                                                                   | Vector Laboratories (RL-1072) |
| Dylight 488-conjugated Streptavidin                          |                                                                   | Vector (SA-5488)              |
| <b>Flow cytometry</b>                                        |                                                                   |                               |
| <b>Antigen</b>                                               | <b>Name</b>                                                       | <b>Company</b>                |
| KIT                                                          | Allophycocyanin(APC)-conjugated rat anti-mouse CD117 (c-Kit)      | eBioscience (clone ACK2)      |
| EPCAM                                                        | Rat anti-mouse CD326 (EPCAM)                                      | BioLegend (clone G8.8)        |
| CDH1                                                         | Alexa Fluor 647-conjugated rat anti-CD324 (CDH1)                  | eBioscience (clone DECMA-1)   |
| ITGA6                                                        | APC-conjugated rat anti-human/mouse CD49f ( $\alpha 6$ -integrin) | eBioscience (clone GoH3)      |
| ITGB1                                                        | Biotin-conjugated hamster anti-rat CD29 ( $\beta 1$ -integrin)    | BD Biosciences (clone Ha2/5)  |
| CD9                                                          | APC-conjugated rat anti-mouse CD9                                 | eBioscience (clone KMC8)      |
| GFRA1                                                        | Mouse anti-rat Gfr $\alpha$ 1                                     | R&D systems (MAB560)          |
| FUT4                                                         | Biotin-conjugated anti-mouse/human SSEA-1                         | eBioscience (clone MC-480)    |
| <b>Secondary reagents</b>                                    |                                                                   |                               |
| APC-conjugated Streptavidin                                  |                                                                   | eBioscience (17-4317)         |
| APC-conjugated goat anti-rat IgG+IgM                         |                                                                   | BD Bioscience (551019)        |
| <b>Western blotting</b>                                      |                                                                   |                               |
| <b>Antigen</b>                                               | <b>Name</b>                                                       | <b>Company</b>                |
| p-MTOR                                                       | Rabbit anti- phospho-MTOR(Ser2448) antibody                       | Cell signaling (5536)         |
| p-RPS6KB1                                                    | Rabbit anti- phospho-RPS6KB1(Ser371) antibody                     | Cell signaling (9208)         |
| p-RPS6KB1                                                    | Rabbit anti- phospho-RPS6KB1(Thr389) antibody                     | Cell signaling (9234)         |
| p-EIF4EBP1                                                   | Rabbit anti- phospho-EIF4EBP1(Thr37/46) antibody                  | Cell signaling (2855)         |
| p-AKT1(Thr308)                                               | Rabbit anti-mouse p-AKT(Thr308)                                   | Cell Signaling (9275)         |
| p-AKT1(Ser473)                                               | Rabbit anti-mouse p-AKT(Ser473) antibody                          | Cell Signaling (9271)         |
| p-MAP2K1/2 (Ser217/221)                                      | Rabbit anti-human p-MEK1/2 (Ser217/221) antibody                  | Cell Signaling (9121)         |
| ACTB                                                         | Mouse anti- $\beta$ -actin antibody                               | Sigma (clone AC-15)           |
| <b>Secondary reagents</b>                                    |                                                                   |                               |
| HRP (horseradish peroxidase)-conjugated horse anti-mouse IgG |                                                                   | Cell Signaling (7076)         |
| HRP-conjugated horse anti-rabbit IgG                         |                                                                   | Cell Signaling (7074)         |

**Supplementary Table 2. PCR primers**

| <b>RT-PCR</b>          | Forward                    | Reverse                            |
|------------------------|----------------------------|------------------------------------|
| <i>Bcl6b</i>           | ACTCCTCCGACGTGCTTAGC       | GGCCCCGGAAAATTGAATTAG              |
| <i>Eiv5</i>            | TGTGATCAGCAAGTCCCTTT       | GTGAGCCAGATCTGTGTCCA               |
| <i>Id4</i>             | GTTACAGAGCATTACCGTA        | AAGGTTGGATTACAGATTGC               |
| <i>Nanos2</i>          | CCATATGCAACTTCTGCAAGC      | TGAGTGTATGAGCCTGGTCG               |
| <i>Nanos3</i>          | CTTCTGTCTACTGCTACACCACC    | TTGGAACCTGCATAGACACC               |
| <i>Neurog3</i>         | AGCAGAGAGGCTCAGCTATCC      | AACTGAGCACTTCGTGGTCC               |
| <i>Pou5f1</i>          | CCCAACGAGAAGAGTATGAGG      | TGATCAACAGCATCACTGAGC              |
| <i>Zbtb16</i>          | AGGGAGCTGTTTCAGCAAGCT      | TCATCCCACTGTGCAGTTTC               |
| <i>Ccnd1</i>           | CGGATGAGAACAAGCAGACC       | TTCAATCTGTTCCCTGGCAGG              |
| <i>Ccnd2</i>           | TTCATTGAGCACATCCTTCG       | TTCATCATCCTGCTGAAGCC               |
| <i>Ccnd3</i>           | CTATACGGACCAGGCTGTGG       | ATGGATGGAGGATACATCGC               |
| <i>Cdkn1a</i>          | GCAGATCCACAGCGATATCC       | CAACTGCTCACTGTCCACGG               |
| <i>Cdkn1b</i>          | AGGAGAGCCAGGATGTCAGC       | GAATCTTCTGCAGCAGGTCG               |
| <i>Hprt</i>            | GCTGGTGAAAAGGACCTCT        | CACAGGACTAGAACACCTGC               |
| <b>qPCR</b>            | Forward                    | Reverse                            |
| <i>Gdnf</i>            | CTTCGCGCTGACCAGTGACT       | CGCTTGTTTATCTGGTGACC               |
| <i>Cxcl12</i>          | GCTCTGCATCAGTGACG          | TTCAGATGCTTGACGTTGGC               |
| <i>Ccl9</i>            | CCCTCTCCTTCCTCATTCTTACA    | AGTCTTGAAAGCCCATGTGAAA             |
| <i>Fgf2</i>            | CTCTACTGCAAGAACGGCG        | CATAGCAAGGTACCGGTTGG               |
| <i>Wnt5a</i>           | TCCTATGAGAGCGCACGCAT       | CAGCTTGCCCCGGCTGTTGA               |
| <i>Bcl6b</i>           | ACTCCTCCGACGTGCTTAGC       | GGCCCCGGAAAATTGAATTAG              |
| <i>Nanos2</i>          | CCATATGCAACTTCTGCAAGC      | TGAGTGTATGAGCCTGGTCG               |
| <i>Nanos3</i>          | CTTCTGTCTACTGCTACACCACC    | TTGGAACCTGCATAGACACC               |
| <i>Neurog3</i>         | AGCAGAGAGGCTCAGCTATCC      | AACTGAGCACTTCGTGGTCC               |
| <i>Ccnd1</i>           | CGGATGAGAACAAGCAGACC       | TTCAATCTGTTCCCTGGCAGG              |
| <i>Cdkn1a</i>          | GCAGATCCACAGCGATATCC       | CAACTGCTCACTGTCCACGG               |
| <i>Cdkn1b</i>          | AGGAGAGCCAGGATGTCAGC       | GAATCTTCTGCAGCAGGTCG               |
| <i>Cldn3</i>           | CACCACTACCAGCAGTCGATGAAC   | AGACTGTGTGTCGTCTGTCACCATC          |
| <i>Cldn5</i> (Fig. 4A) | TAACCTGAAAGGGCAGCTGGAGAAAC | AGGTCCAGGCTAAGTCCTTTGGTTCAGTA<br>G |
| <i>Cldn5</i> (Fig.4E)  | GTCCGCGAGTTCTATGATCC       | TGTCGTAATCGCCATTGGCC               |
| <i>Cldn11</i>          | CTGCCGAAAAATGGACGAACTG     | TGCACGTAGCCTGGAAGGATGA             |
| <i>Eiv5</i>            | TGTGATCAGCAAGTCCCTTT       | GTGAGCCAGATCTGTGTCCA               |
| <i>Gata4</i>           | CCTCTATCACAAGATGAACG       | CAGCGTGGTGGTGGTAGTCT               |
